# Supplementary material for: Ultrafast light-activated polymeric nanomotors
Source: PubMed Central journal article supplement (PMC11161643; doi:10.1038/s41467-024-49217-w), 2024-06-07
Supplement: 41467_2024_49217_MOESM3_ESM.pdf [file 41467_2024_49217_MOESM3_ESM.pdf]

## Description of Additional Supplementary Files

### **Supplementary Movie Legends**

**Supplementary Movie 1.** Nanoparticle tracking video of Au-polymersomes under laser irradiation (660 nm, 1 W).

**Supplementary Movie 2.** Nanoparticle tracking video of Au-stomatocytes under laser irradiation (660 nm, 1 W)

**Supplementary Movie 3.** Nanoparticle tracking video of Au-stomatocytes without laser irradiation (660 nm, 0 W)

**Supplementary Movie 4.** Motion behavior of Au-stomatocytes under laser irradiation (660 nm, 1.5 W)

**Supplementary Movie 5.** Motion behavior of Au-stomatocytes under laser irradiation from bottom right to the upper left (660 nm, 1.5 W)

**Supplementary Movie 6.** Cryo-electron tomography 3D reconstruction of a typical Au-stomatocyte.  
Playback frame rate: 50 fps.

**Supplementary Movie 7.** Nanoparticle tracking video of DOX-stomatocytes without TP-NIR irradiation

**Supplementary Movie 8.** Motion behavior of DOX-stomatocytes with TP-NIR irradiation
